# Supplementary material for: Simultaneous adsorption of SO2 and CO2 in an Ni(bdc)(ted)0.5 metal–organic framework
Source: PubMed Central journal article supplement — RSC Adv. 2018 Nov 16;8(67):38648–55. doi: 10.1039/c8ra07919f (PMC9091012; doi:10.1039/c8ra07919f), 2018-11-16
Supplement: RA-008-C8RA07919F-s001.pdf [file RA-008-C8RA07919F-s001.pdf]

Electronic Supplementary Information:

# Simultaneous adsorption of SO<sub>2</sub> and CO<sub>2</sub> in metal-organic framework Ni(bdc)(ted)<sub>0.5</sub>

*Do Ngoc Son,<sup>\*,†</sup> Ta Thi Thuy Huong,<sup>†</sup> and Viorel Chihaiia<sup>‡</sup>*

<sup>†</sup> University of Technology, VNU-HCM, 268 Ly Thuong Kiet Street, District 10, Ho Chi Minh City, Vietnam

<sup>‡</sup> Institute of Physical Chemistry “Ilie Murgulescu” of the Romanian Academy, Splaiul Independentei 202, Sector 6, 060021 Bucharest, Romania

## Corresponding author

\*E-mail: [dnson@hcmut.edu.vn](mailto:dnson@hcmut.edu.vn)

1. Molecular orbital diagram for SO<sub>2</sub>.
2. Molecular orbital diagram for CO<sub>2</sub>.

## 1. Molecular orbital diagram for SO<sub>2</sub>

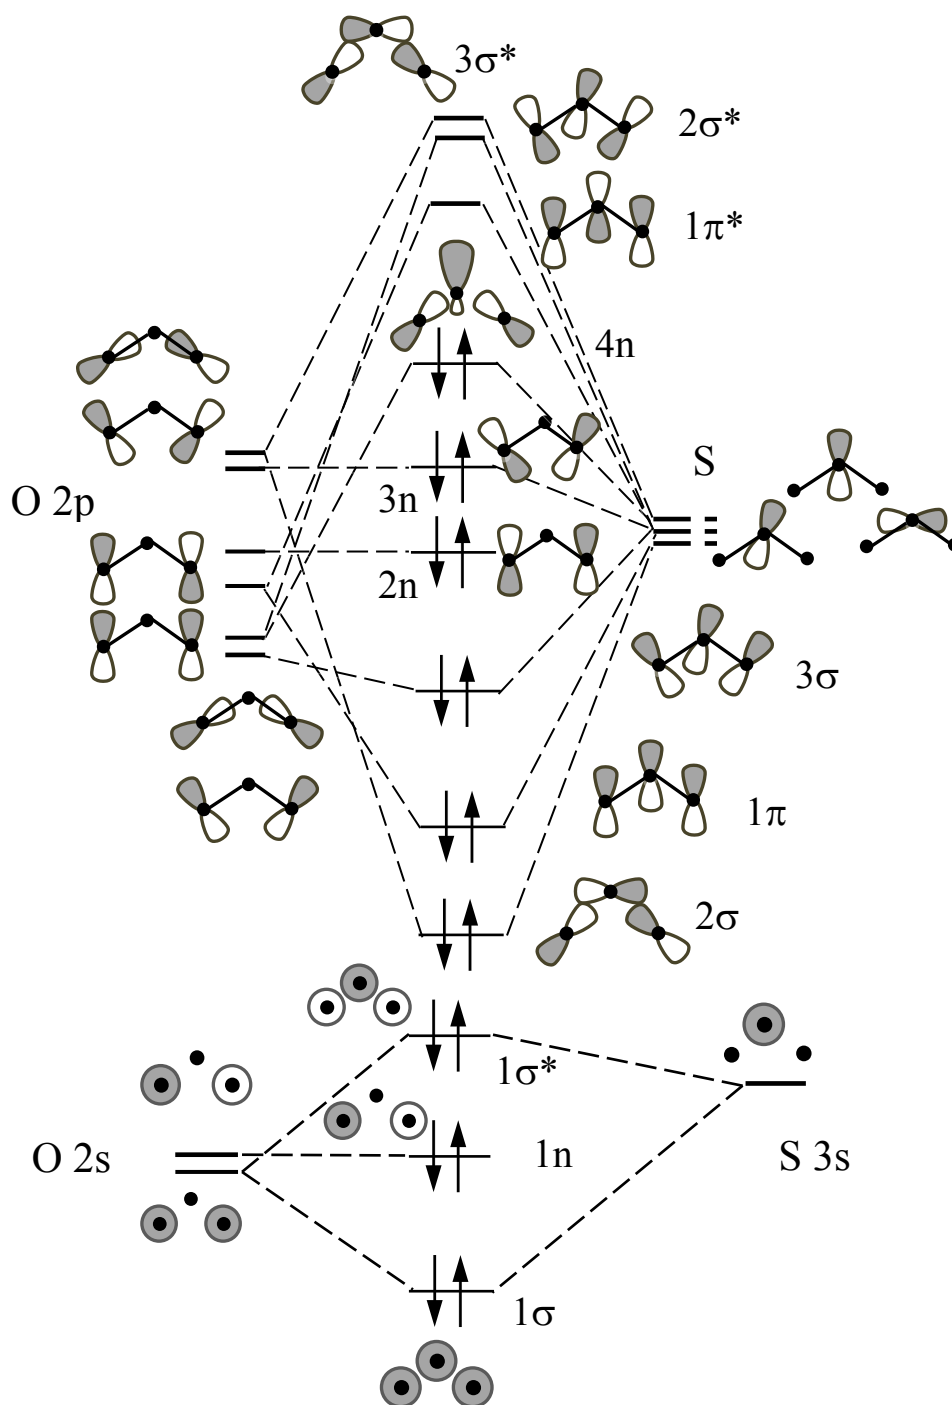

**Scheme S1.** Molecular orbital diagram for SO<sub>2</sub>. The  $4n$  state is the combination of the  $sp^2$  hybridization of the sulfur and the  $p$  orbitals of the oxygen atoms. This state corresponds to the highest occupied molecular orbital (HOMO) in the DOS of SO<sub>2</sub>. The  $3n$  and  $2n$  states are the non-bonding states of the oxygen atoms, and the  $1\pi^*$  state is the anti-bonding state which corresponds to the lowest unoccupied molecular orbital (LUMO) in the DOS of SO<sub>2</sub>.

## 2. Molecular orbital diagram for CO<sub>2</sub>

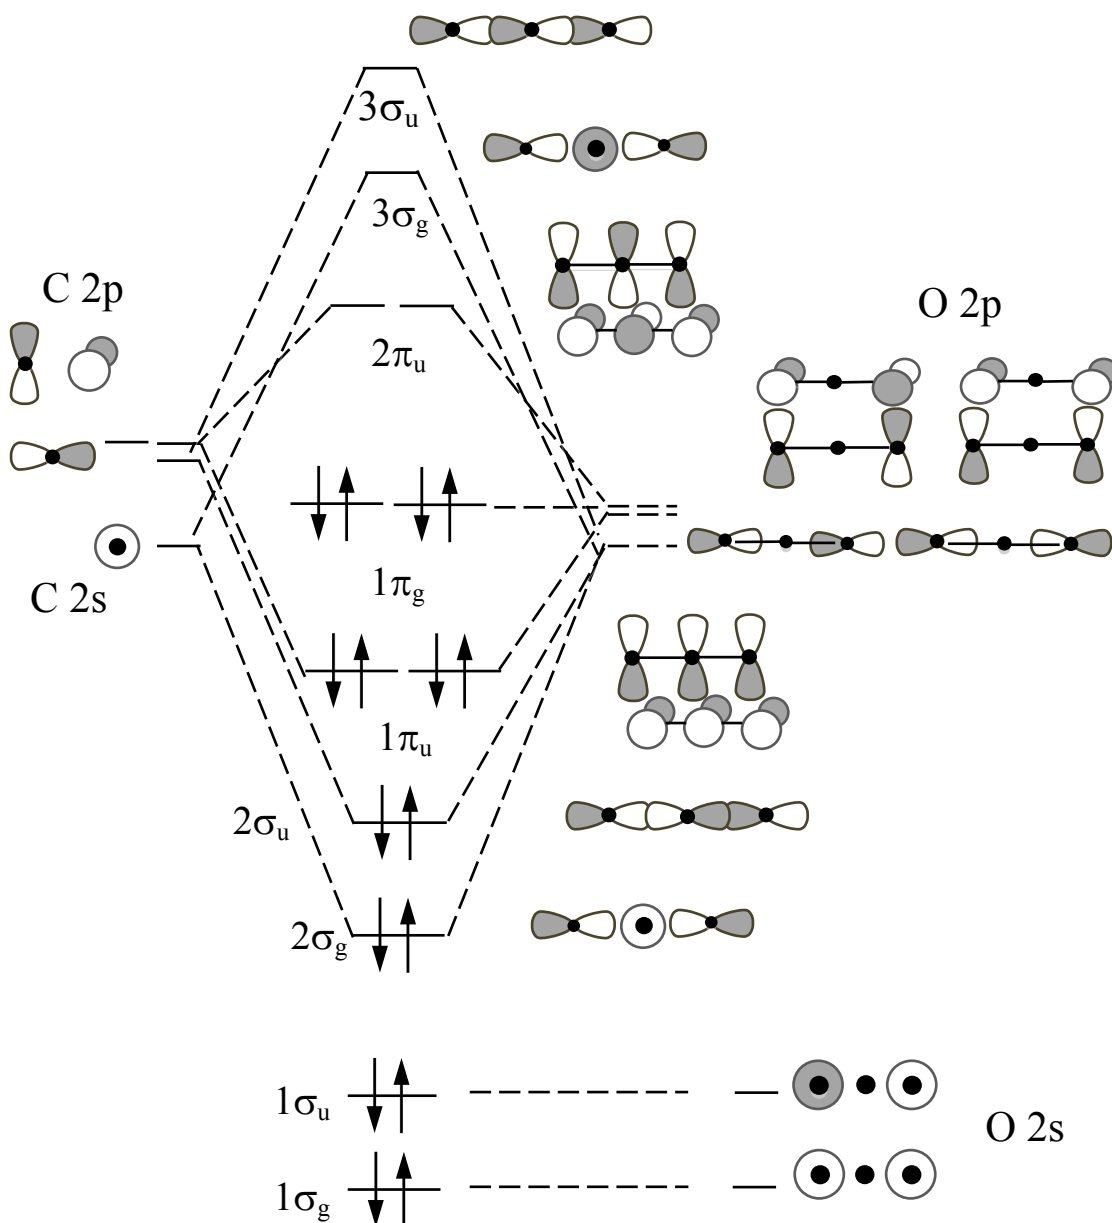

**Scheme S2.** Molecular orbital diagram for CO<sub>2</sub>. The 1π<sub>g</sub> states is the non-bonding states of CO<sub>2</sub> which correspond to the lone pairs of the oxygen atoms. The non-bonding states correspond to the HOMO in the DOS of CO<sub>2</sub>. The 1π<sub>u</sub> states are the anti-bonding states which correspond to the LUMO of CO<sub>2</sub>.
